# Supplementary material for: Inhibition of Soluble Epoxide Hydrolase Activity by Components of Glycyrrhiza uralensis
Source: MDPI journal article supplement (doi:10.3390/ijms24076485), 2023-03-30
Supplement: s1 [file s1]

# Inhibition of soluble epoxide hydrolase activity by components of *Glycyrrhiza uralensis*

Jang Hoon Kim <sup>1</sup>, Yun-Chan Huh <sup>1</sup>, Mok Hur <sup>1</sup>, Woo Tae Park <sup>1</sup>, Youn-Ho Moon <sup>1</sup>, Tae Il Kim <sup>1</sup>, Yong Il Kim <sup>1</sup>, Seon Mi Kim <sup>1</sup>, Jeonghoon Lee <sup>1,\*</sup> and Ik Soo Lee <sup>2,\*</sup>

<sup>1</sup> Department of Herbal Crop Research, National Institute of Horticultural and Herbal Science, RDA, Eumseong 27709, Republic of Korea

<sup>2</sup> Km Convergence Research Division, Korea Institute of Oriental Medicine, Daejeon 34134, Republic of Korea

\* Correspondence: artemisia@korea.kr (J.L.); knifer48@kiom.re.kr (I.S.L.);  
Tel.: +82-42-871-5670 (J.L.); +82-42-868-9462 (I.S.L.)

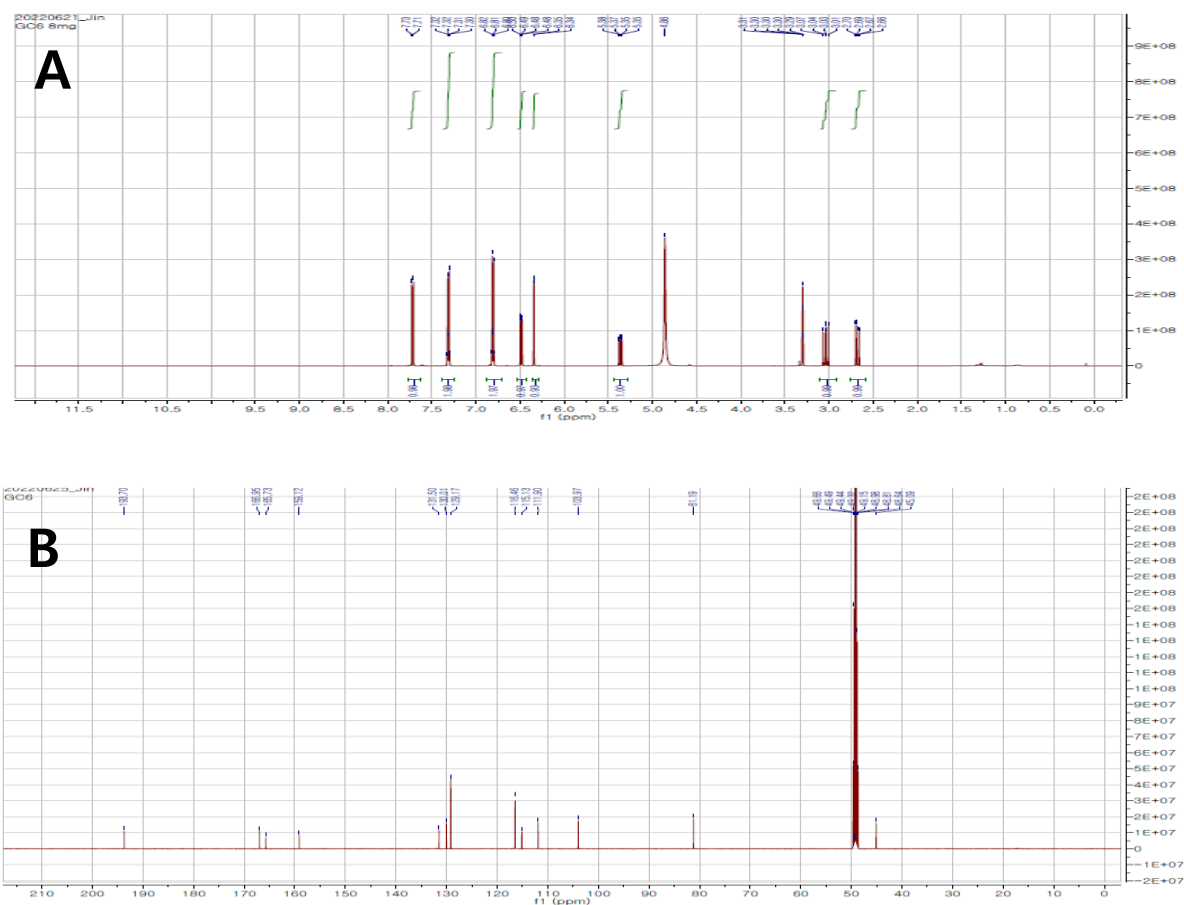

**Figure S1.** <sup>1</sup>H NMR(A) and <sup>13</sup>C NMR(B) spectra of compound 1 in MeOD-*d*<sub>4</sub> (400 MHz for <sup>1</sup>H NMR, 100 MHz for <sup>13</sup>C NMR)

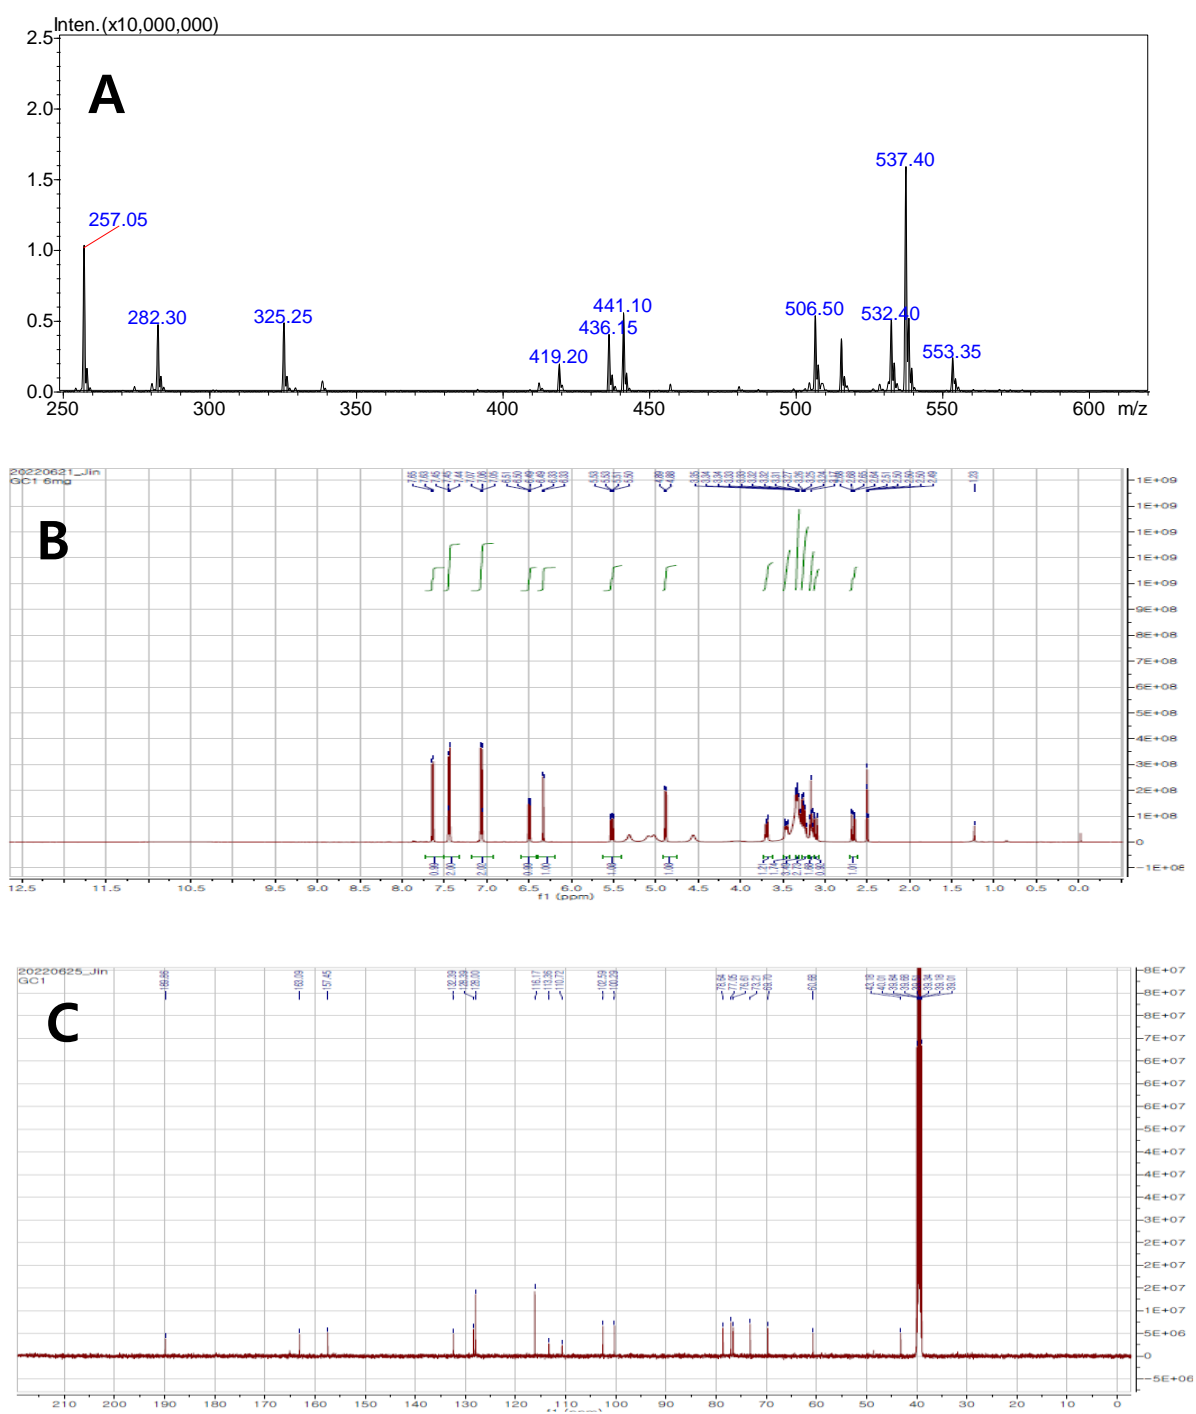

**Figure S2.** LC-MS(A),  $^1\text{H}$  NMR(B) and  $^{13}\text{C}$  NMR(C) spectra of compound **2** in  $\text{MeOD-}d_4$  (400 MHz for  $^1\text{H}$  NMR, 100 MHz for  $^{13}\text{C}$  NMR)

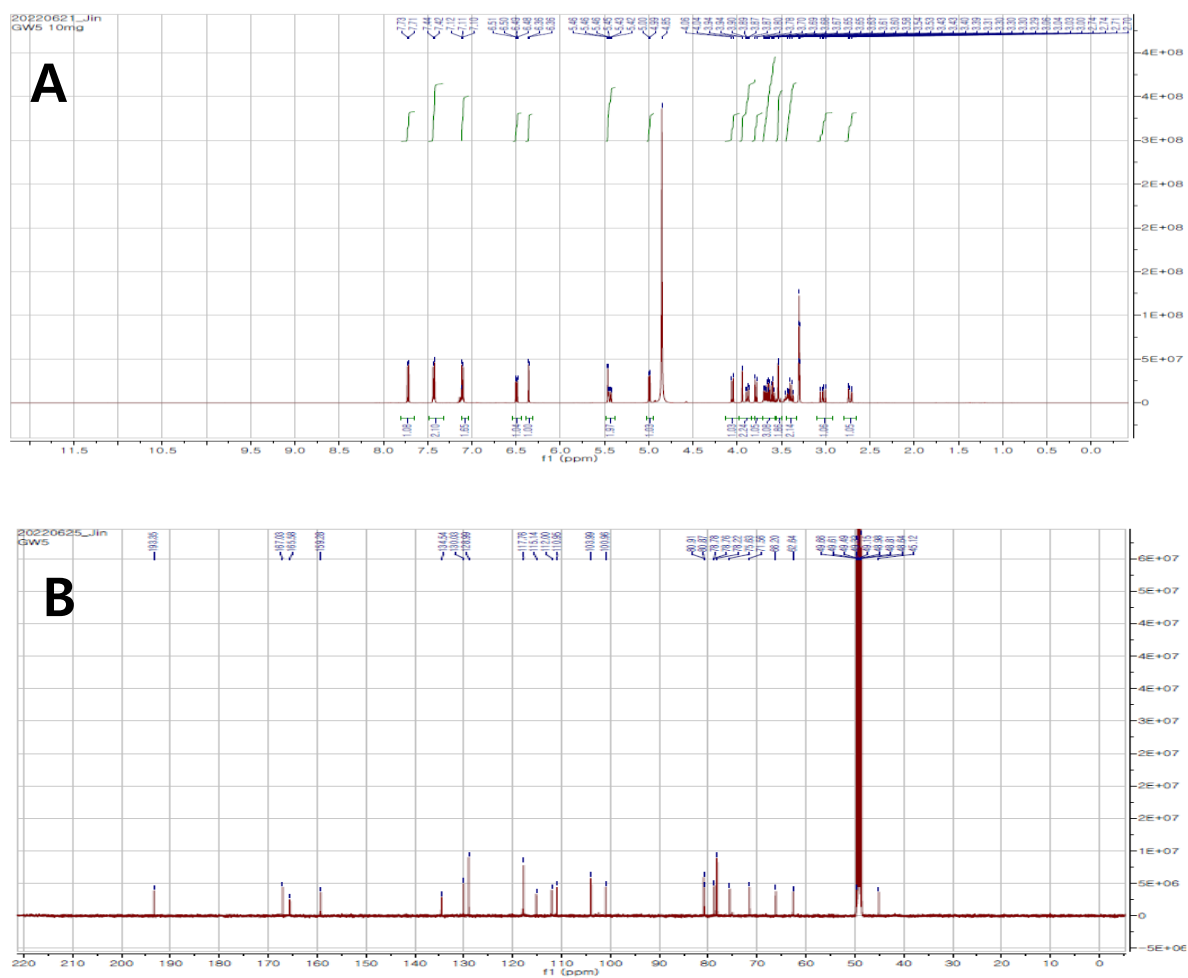

**Figure S3.**  $^1\text{H}$  NMR(A) and  $^{13}\text{C}$  NMR(B) spectra of compound **3** in  $\text{MeOD-}d_4$  (400 MHz for  $^1\text{H}$  NMR, 100 MHz for  $^{13}\text{C}$  NMR)

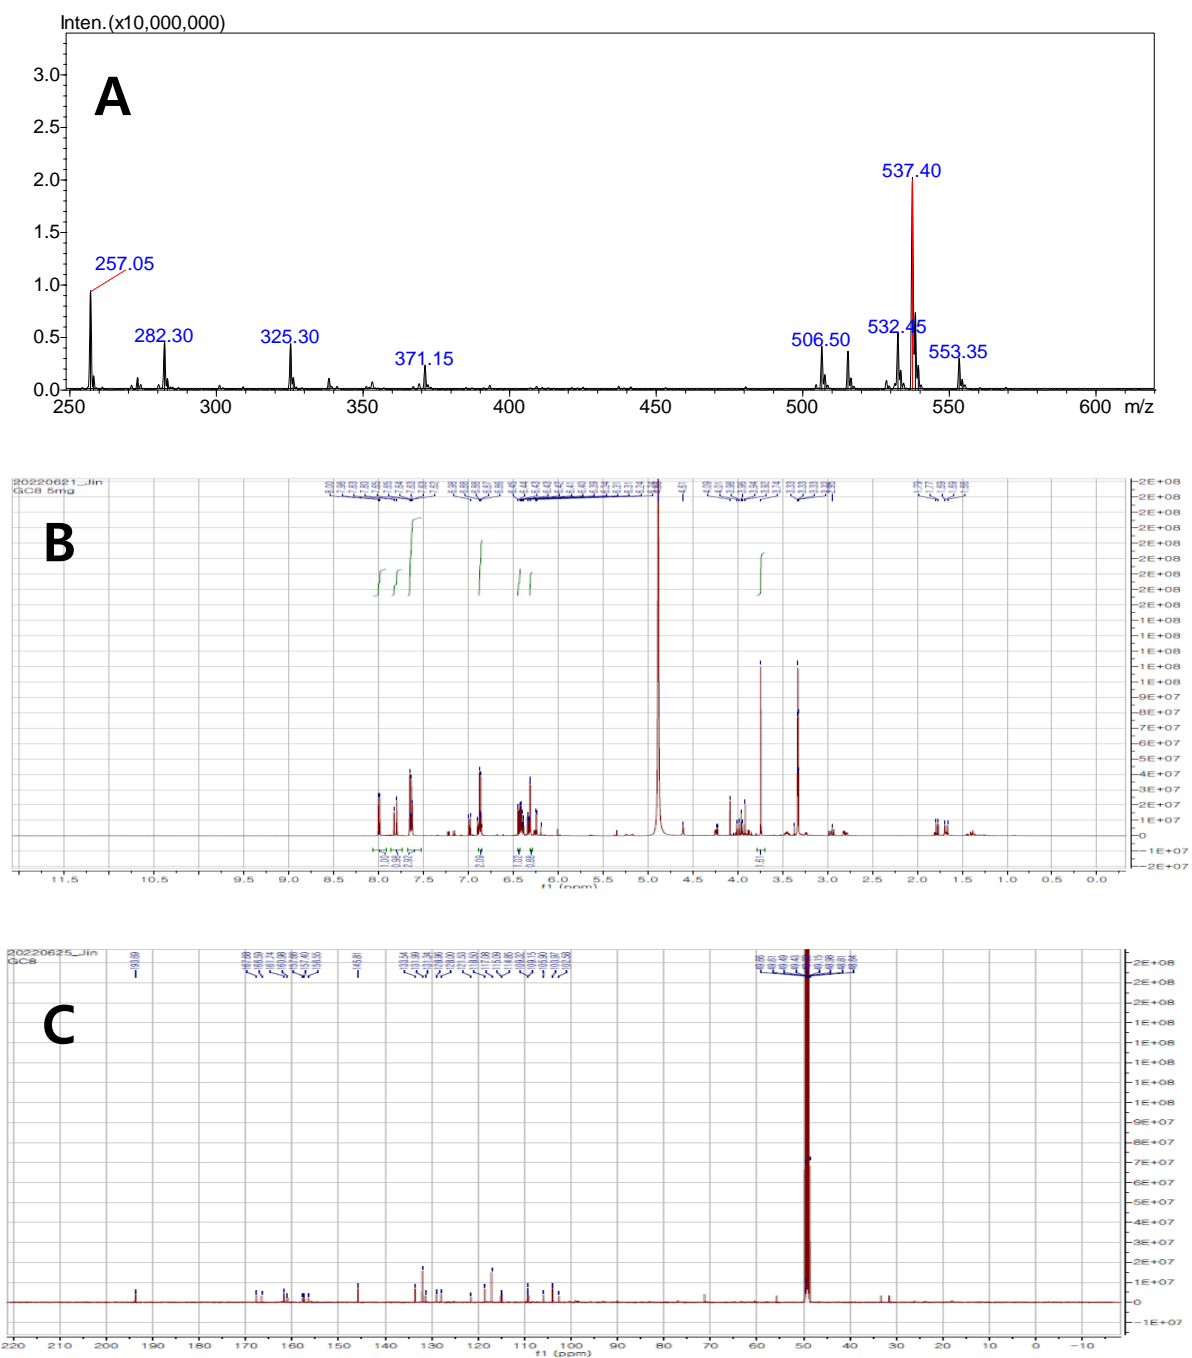

**Figure S4.** LC-MS(A),  $^1\text{H}$  NMR(B) and  $^{13}\text{C}$  NMR(C) spectra of compound **4** in  $\text{MeOD-}d_4$  (400 MHz for  $^1\text{H}$  NMR, 100 MHz for  $^{13}\text{C}$  NMR)

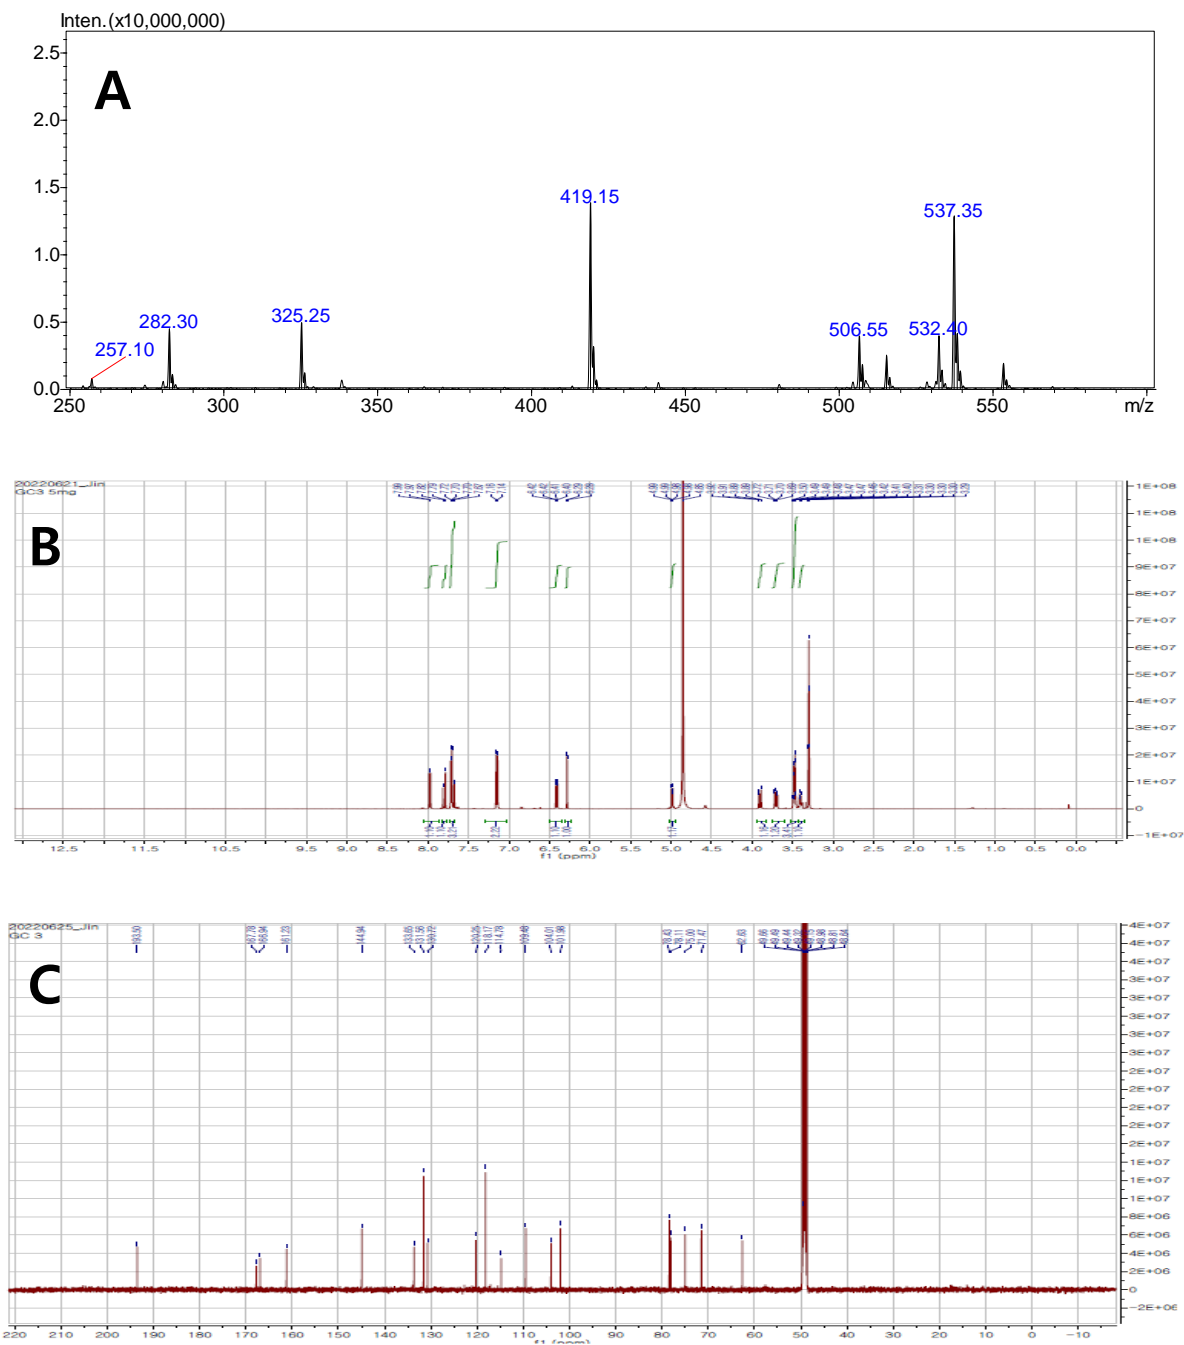

**Figure S5.** LC-MS(A),  $^1\text{H}$  NMR(B) and  $^{13}\text{C}$  NMR(C) spectra of compound **5** in  $\text{MeOD-}d_4$  (400 MHz for  $^1\text{H}$  NMR, 100 MHz for  $^{13}\text{C}$  NMR)

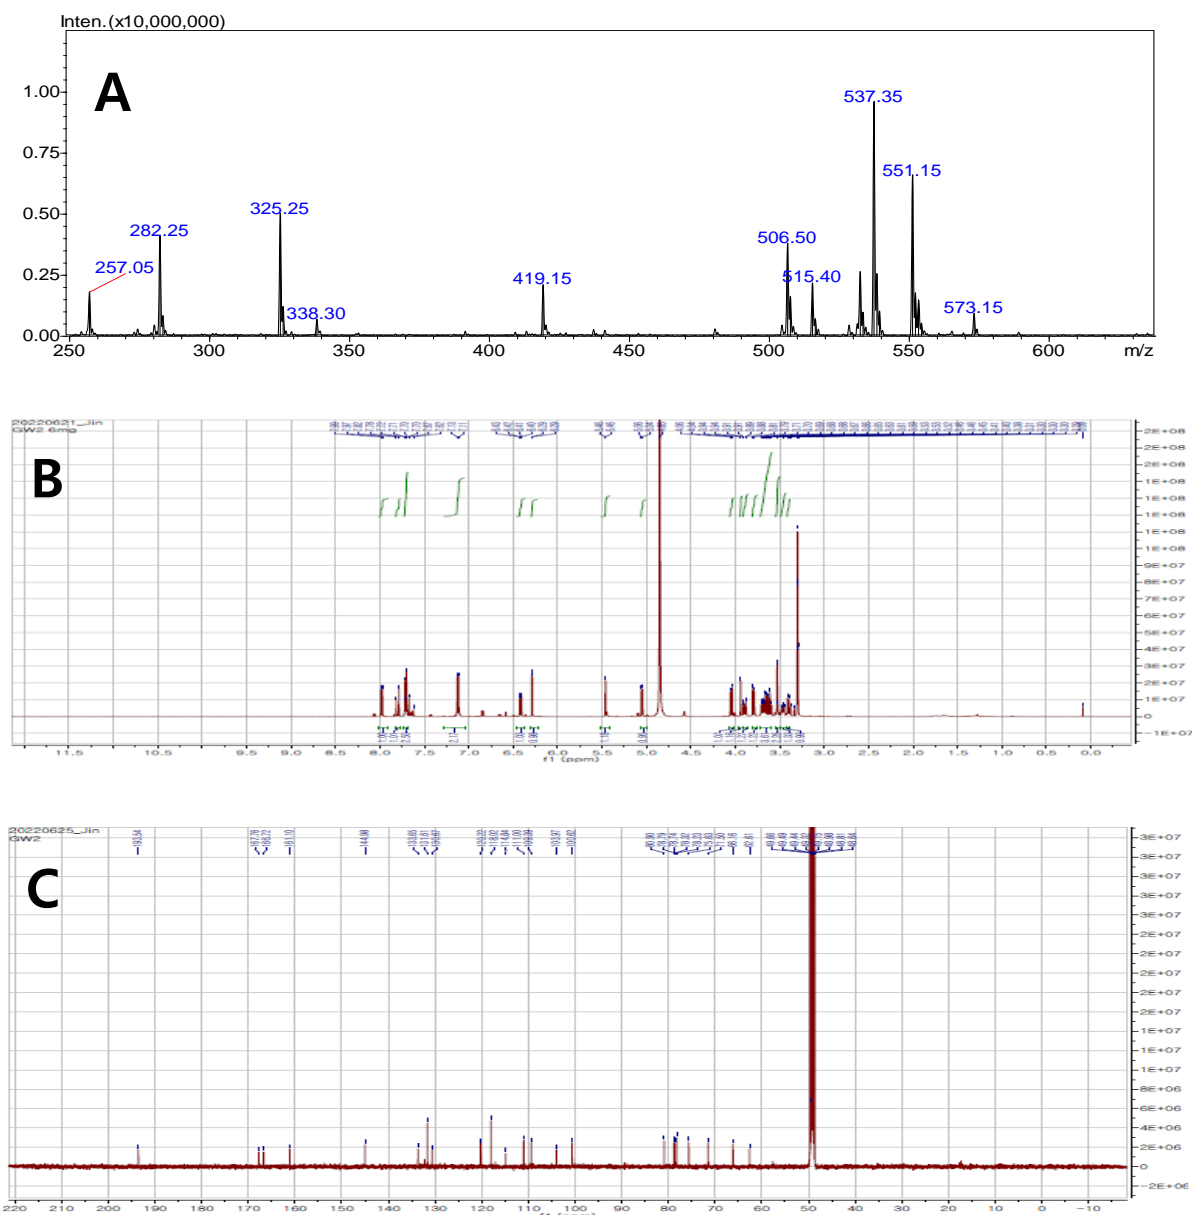

**Figure S6.** LC-MS(A),  $^1\text{H}$  NMR(B) and  $^{13}\text{C}$  NMR(C) spectra of compound **6** in  $\text{MeOD-}d_4$  (400 MHz for  $^1\text{H}$  NMR, 100 MHz for  $^{13}\text{C}$  NMR)

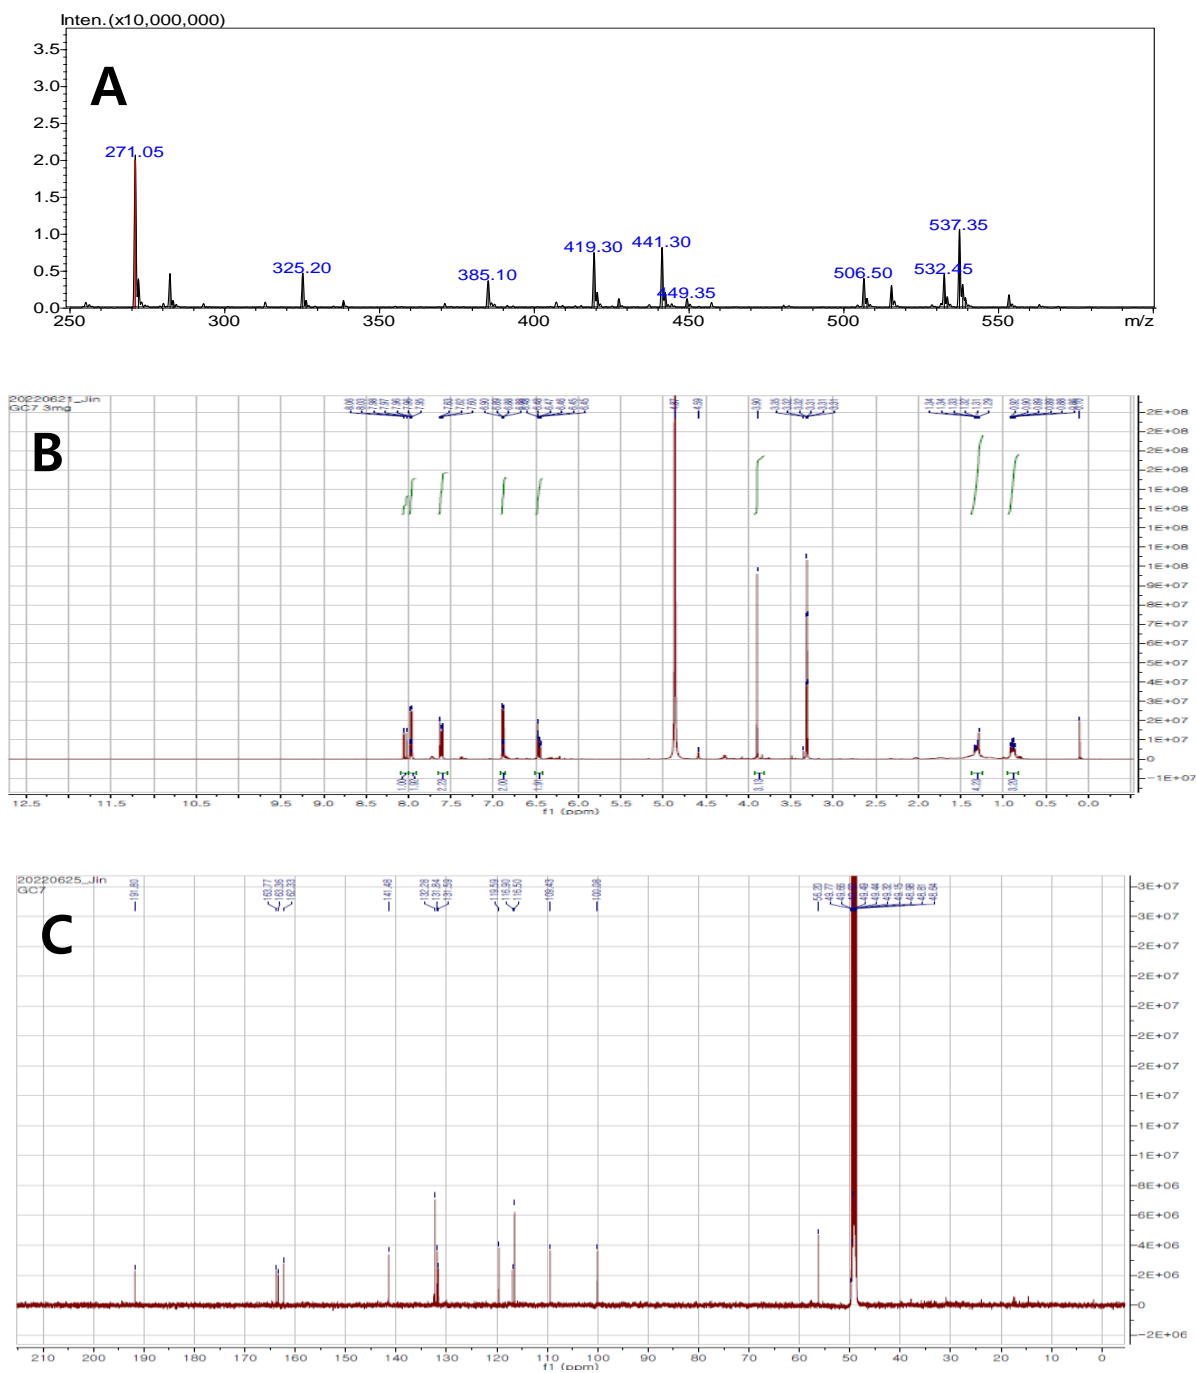

**Figure S7.** LC-MS(A),  $^1\text{H}$  NMR(B) and  $^{13}\text{C}$  NMR(C) spectra of compound **7** in  $\text{MeOD-}d_4$  (400 MHz for  $^1\text{H}$  NMR, 100 MHz for  $^{13}\text{C}$  NMR)

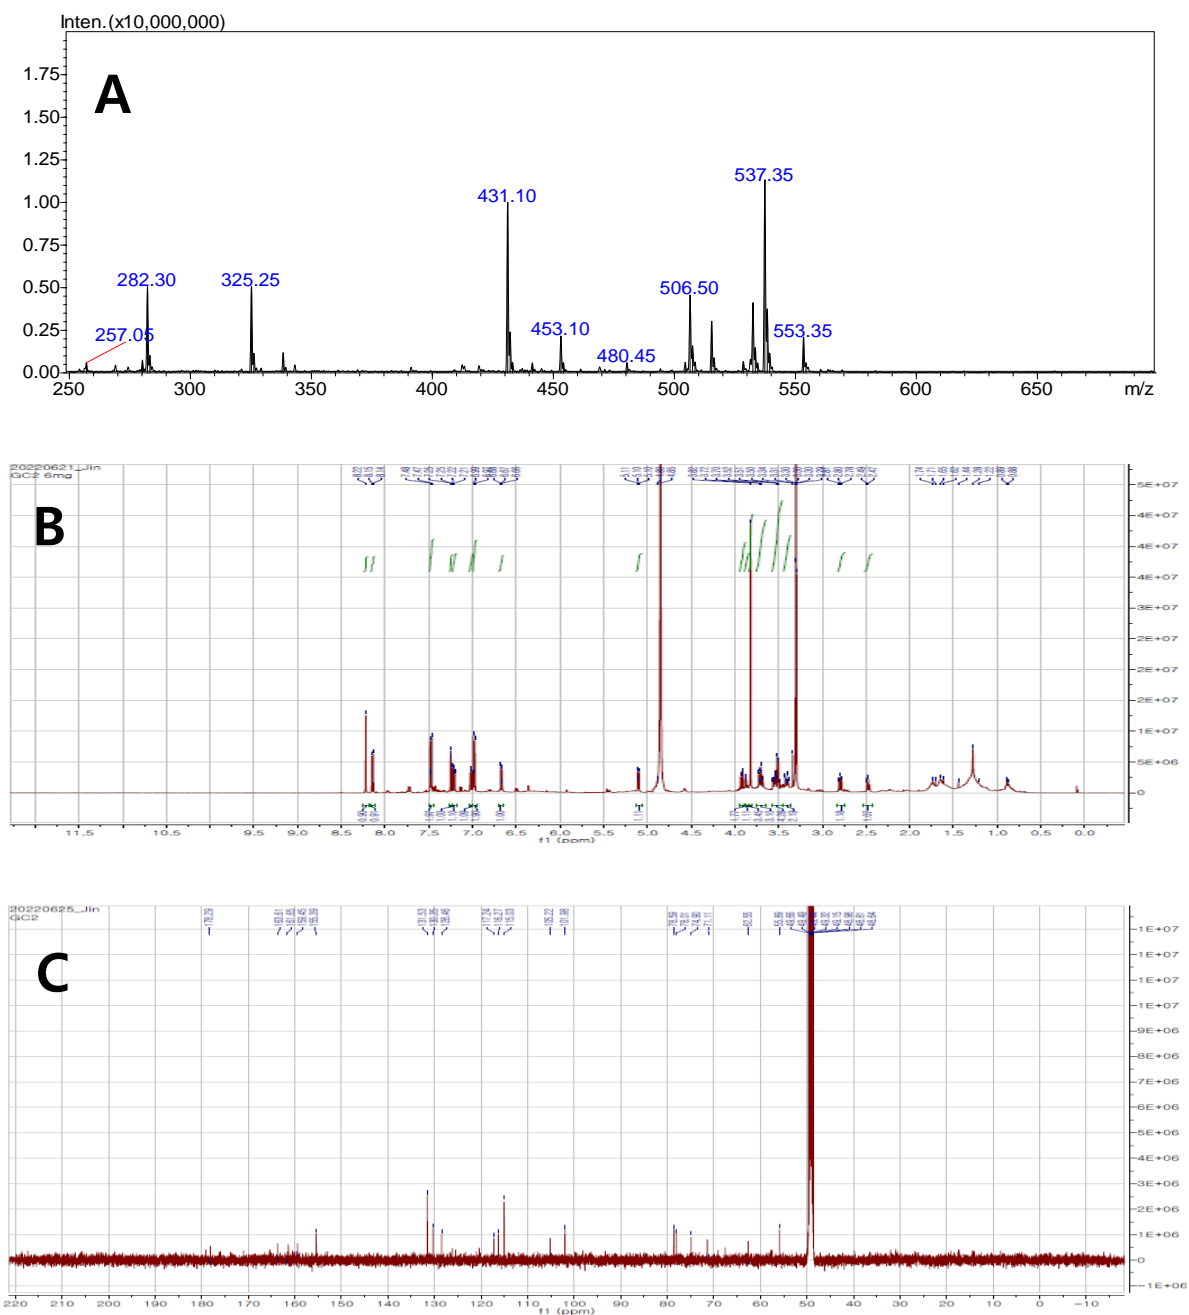

**Figure S8.** LC-MS(A),  $^1\text{H}$  NMR(B) and  $^{13}\text{C}$  NMR(C) spectra of compound **8** in  $\text{MeOD-}d_4$  (400 MHz for  $^1\text{H}$  NMR, 100 MHz for  $^{13}\text{C}$  NMR)



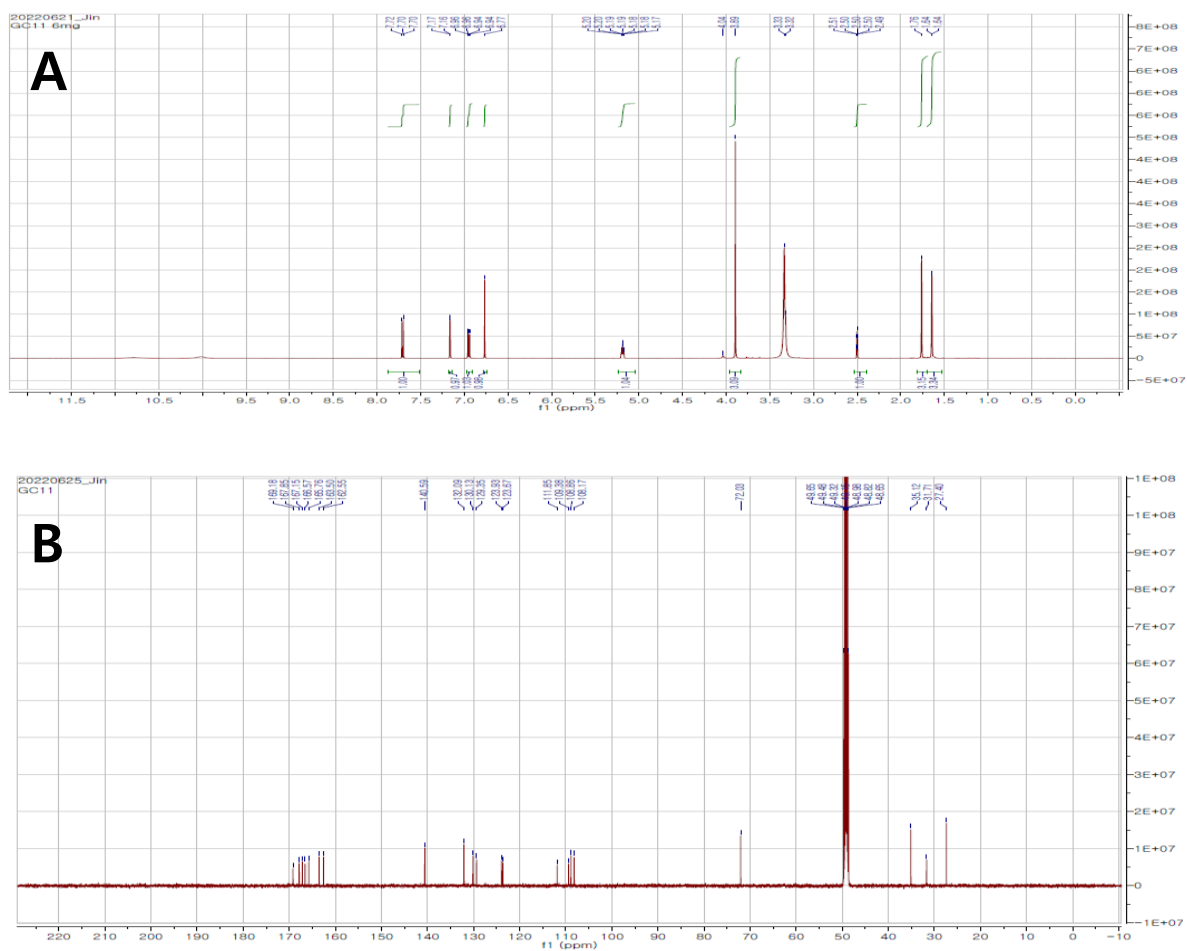

**Figure S9.**  $^1\text{H}$  NMR(A) and  $^{13}\text{C}$  NMR(B) spectra of compound **9** in  $\text{MeOD-}d_4$  (400 MHz for  $^1\text{H}$  NMR, 100 MHz for  $^{13}\text{C}$  NMR)

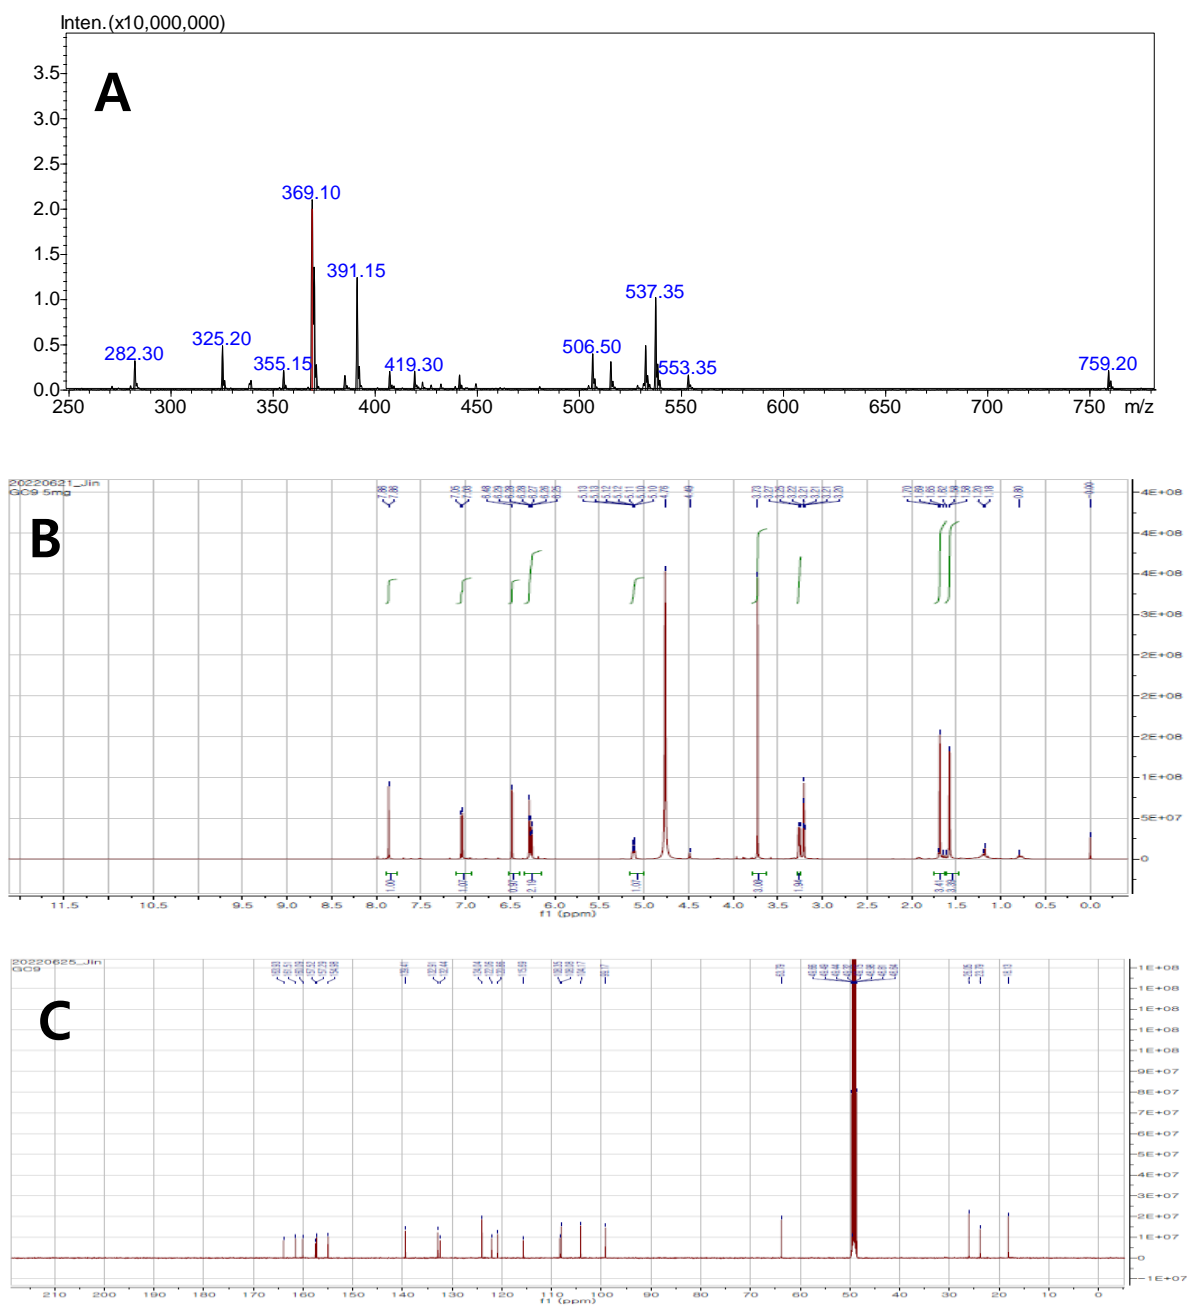

**Figure S10.** LC-MS(A),  $^1\text{H}$  NMR(B) and  $^{13}\text{C}$  NMR(C) spectra of compound **10** in  $\text{MeOD-}d_4$  (400 MHz for  $^1\text{H}$  NMR, 100 MHz for  $^{13}\text{C}$  NMR)

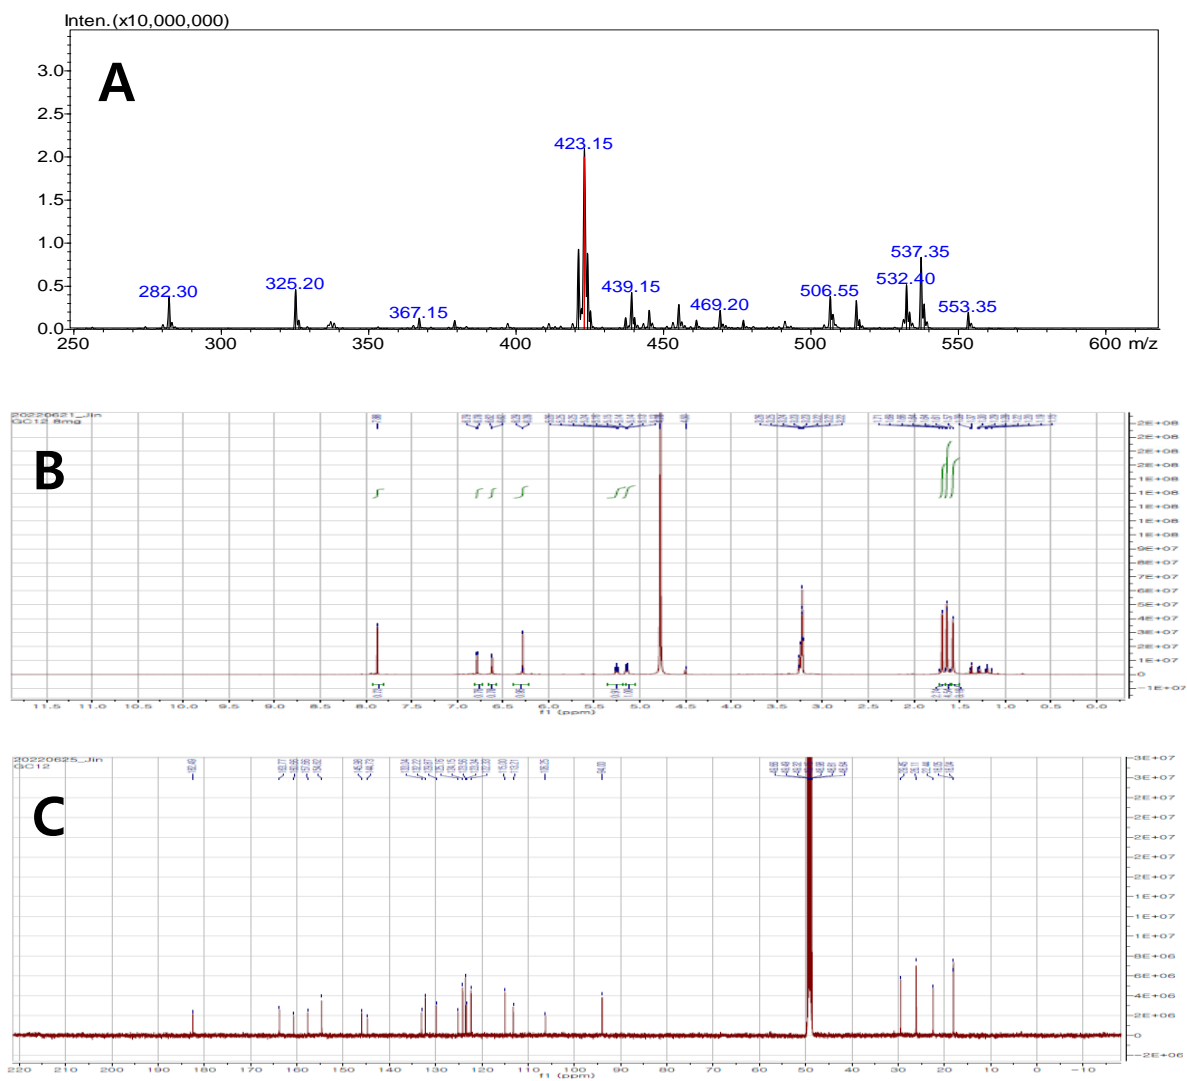

**Figure S11.** LC-MS(A), <sup>1</sup>H NMR(B) and <sup>13</sup>C NMR(C) spectra of compound **11** in MeOD-*d*<sub>4</sub> (400 MHz for <sup>1</sup>H NMR, 100 MHz for <sup>13</sup>C NMR)
